# Supplementary material
Source: publisher figshare collection journal article supplement (https://frontiersin.figshare.com/ndownloader/files/14634605)
Supplement: Supplementary file 1 [file 14634605]

## Sheet: Sheet1
Table S4. Factor Analysis for PCA plots in Fig. S3.
Variable	Factor 1	Factor 2	Factor 3	Variable Details
Latitude [degrees North]	0.287946	-0.036151	0.418015
Longitude [degrees East]	0.066843	-0.247778	0.451627
Sampling depth [m]	-0.769042	0.101466	0.376012
Mean_Temperature [ITS-90, deg C]	0.726087	-0.288919	-0.271032
Mean_Oxygen, adjusted [umol/Kg]	0.215671	-0.514547	-0.191298
Mean_Chloro HPLC adjusted [mg Chl/m3]	0.698903	0.379455	-0.168682
Mean_Angular scattering coef, at 117, 470 nm, adj in situ dark [m-1 Sr-1]	0.75798	0.251429	0.002567
Mean_bbp470, adj in situ dark [m-1]	0.808983	0.187773	-0.270557	Backscattering coefficient of particles, 470 nm [1/m]
Mean_Fcdom, factory [ppb QSE]	-0.603167	0.690601	0.214266	Fluorescence, colored dissolved organic matter
Mean Depth MLD Sigma (m)	0.111548	-0.465567	0.744875	Mixed layer depth mean depth
Mean Depth Max Fluo (m)	-0.307782	-0.499879	-0.582156	Maximum fluorescence mean depth
Mean Depth Max N2 (m)	0.128106	-0.37348	0.722722	Mean Depth of the Maximum of Brünt-Väisälä Frequency
FLAG SEASON 1-4 (Spring-Summer-Autumn-Winter)	0.191482	-0.171852	0.498623
SEASON PART 1-3 (early middle late)	0.312544	0.501725	0.447131
NO2 [umol/L]	0.514867	0.45897	0.146787
PO4 [umol/L]	-0.631576	0.704195	0.106906
NO2NO3 [umol/L]	-0.677204	0.63853	0.155942
Okubo-Weiss	0.033011	0.271038	-0.2045	Okubo-Weiss criterion for eddy information
Lyapunov_exp.	0.206605	-0.422956	0.620098	Lyapunov exponent
retention	-0.182924	-0.418058	-0.085686	Eddy retention
NPP_8d_(VGPM)_[mgC/m2/day]	0.459475	0.299294	0.619142	Net primary production of carbon
total.hetero	0.608449	0.431367	-0.132044	FC - heterotrophs [cells/mL]	Flow cytometer heterotrophs counts
total.auto	0.767125	-0.095023	-0.050116	FC - autotrophs [cells/mL]	Flow cytometer autotrophs counts
total.bacteria	0.688321	0.400344	-0.133413	FC - bacteria [cells/mL]	Flow cytometer bacteria counts
total.pico.euk	0.724392	0.133641	0.189532	FC - picoeukaryotes [cells/mL]	Flow cytometer picoeukaryotes counts
